# Supplementary material for: Levothyrox® New and Old Formulations: Are they Switchable for Millions of Patients?
Source: Springer Nature journal article supplement (doi:10.1007/s40262-019-00747-3), 2019-04-04
Supplement: MOESM1 [file 16609734]

**Electronic Supplementary Material**

***Clinical Pharmacokinetics***

**Levothyrox® new and old formulations are unlikely switchable for millions of patients**

D. Concordet, P. Gandia, J.L. Montastruc, A. Bousquet-Mélou, P Lees, A. Ferran, P.L. Toutain*

**INTHERES, Université de Toulouse, INRA, ENVT, Toulouse, France**

**The Royal Veterinary College, University of London, London, United Kingdom**

***Corresponding author:** [pltoutain@wanadoo.fr](mailto:pltoutain@wanadoo.fr)

**File R_File.R**: This file contains the R commands that read the data, compute the AUC’s, perform the Figure 1 and compute Table 1.

**File T4_Reference.txt:** This file contains the T4 concentrations observed in 204 individuals after the administration of the **Reference** formulation. The data of each individual is stored by row. The first column contains the patient number, the columns T0, T0.5, T1, T1.5, T2, T2.5, T3, T4, T6, T8, T10, T12, T18, T24, T36, T48, T72 contain the concentrations observed at the corresponding time.

**File T4_Test.txt:** This file contains the T4 concentrations observed in 204 individuals after the administration of the **Test** formulation. The data of each individual is stored by row. The first column contains the patient number, the columns T0, T0.5, T1, T1.5, T2, T2.5, T3, T4, T6, T8, T10, T12, T18, T24, T36, T48, T72 contain the concentrations observed at the corresponding time.
